# Supplementary material
Source: Royal Society of Chemistry journal article supplement (doi:10.1039/d6an00189k)
Supplement: d6an00189k1.pdf [file d6an00189k1.pdf]

## Supporting Information

### **Fluorous Nanoemulsion Optodes with Förster Resonance Energy Transfer-Based Fluorescence Amplification Toward Highly-Sensitive and Selective Detection of Perfluorooctanesulfonate**

Soraka Iwamoto, Tatsuro Endo, Hideaki Hisamoto\*

Department of Applied Chemistry, Graduate School of Engineering, Osaka Metropolitan University,  
1-1 Gakuencho, Nakaku, Sakai, Osaka 599-8531 Japan.

\* To whom correspondence should be addressed Email: [hisamoto@omu.ac.jp](mailto:hisamoto@omu.ac.jp)

## Table of contents

### Experimental Procedures

|                                                                                    |         |
|------------------------------------------------------------------------------------|---------|
| Reagents                                                                           | page S3 |
| Synthesis of R <sub>f</sub> -11-TPE                                                | page S3 |
| Synthesis of [R <sub>f</sub> -DUMBA][R <sub>f</sub> -11-FL]                        | page S3 |
| Synthesis of [R <sub>f</sub> -DUMBA][R <sub>f</sub> -DBSI]                         | page S5 |
| Preparation and characterization of NE                                             | page S5 |
| Fluorescence spectrophotometric measurements of NE                                 | page S6 |
| Evaluation of FRET efficiency and sensitivity                                      | page S7 |
| Evaluation of anion response                                                       | page S8 |
| Fitting with theoretical response curve and calculation of selectivity coefficient | page S8 |

### Supplementary Figures

|          |          |
|----------|----------|
| Fig. S1  | page S9  |
| Fig. S2  | page S9  |
| Fig. S3  | page S10 |
| Fig. S4  | page S11 |
| Fig. S5  | page S12 |
| Table S1 | page S13 |
| Fig. S6  | page S13 |
| Fig. S7  | page S14 |
| Fig. S8  | page S15 |
| Fig. S9  | page S16 |
| Fig. S10 | page S16 |
| Fig. S11 | page S17 |
| Table S2 | page S17 |

## Experimental procedure

### Reagents

4-(1,2,2-Triphenylvinyl) phenol (TPE-OH), dimethyl sulfate, benzotrifluoride, and potassium bis(nonafluorobutanesulfonyl)imide (K[R<sub>F</sub>-DBSI]) were purchased from Tokyo Chemical Industry (Tokyo, Japan), while sodium hydrogen carbonate (NaHCO<sub>3</sub>), chloroform, chloroform-d<sub>1</sub>, 99.8 atom % D with 0.03vol% TMS, dimethyl sulfoxide-d<sub>6</sub>, 99.9 atom % D with 0.03vol% TMS, and methanol-d<sub>4</sub>, 99.8 atom % D with 0.03vol% TMS were purchased from Kanto Chemical (Tokyo, Japan). Benzylamine, potassium carbonate (K<sub>2</sub>CO<sub>3</sub>), dichloromethane, and sodium sulfate (Na<sub>2</sub>SO<sub>4</sub>) were obtained from Fujifilm Wako Pure Chemical Corporation (Osaka, Japan). 4,4,5,5,6,6,7,7,8,8,9,9,10,10,11,11,11-Heptadecafluoroundecyl iodide (C<sub>8</sub>F<sub>17</sub>C<sub>3</sub>H<sub>6</sub>I) was obtained from Sigma Aldrich (St. Louis, MO, USA). Ethyl acetate, hexane and sodium chloride (NaCl) were purchased from NACALAI TESQUE, INC. (Kyoto, Japan).

### *Synthesis of the fluoroalkyl-containing donor dye ((2-(4-((4,4,5,5,6,6,7,7,8,8,9,9,10,10,11,11,11-heptadecafluoroundecyl)oxy)phenyl)ethene-1,1,2-triyl)tribenzene: R<sub>F</sub>-11-TPE)*

TPE-OH (428.2 mg, 1.23 mmol) was dissolved in 20 mL of acetonitrile (ACN). Then, K<sub>2</sub>CO<sub>3</sub> (208.6 mg, 1.51 mmol) was added, and the mixture was heated and stirred at 60°C for 10 minutes. Next, C<sub>8</sub>F<sub>17</sub>C<sub>3</sub>H<sub>6</sub>I (874.2 mg, 1.49 mmol) dissolved in 10 mL of ACN was added dropwise, and the mixture was heated and stirred at 60°C overnight. After the reaction, the reaction solvent was evaporated off, then dissolved in chloroform, and washed with distilled water, and saturated NaCl aq. After drying the organic layer over anhydrous sodium sulfate, the solvent was evaporated off using an evaporator, and the layer was dried in vacuum. The obtained crude product was purified by silica gel column chromatography (hexane → hexane/chloroform = 9/1) to produce R<sub>F</sub>-11-TPE (733.6 mg, 73.8 %).

<sup>1</sup>H NMR (400 MHz, Chloroform-d<sub>1</sub>) δ = 7.15–6.92 (m, 17H), 6.62 (d, 2H), 3.96 (t, 2H), 2.27 (dt, 2H), 2.05 (t, 2H)

Anal. Calcd for C<sub>37</sub>H<sub>25</sub>F<sub>17</sub>O: C, 54.96; H, 3.12. Found: C, 54.98; H, 3.28.

ESI-MS *m/z*: Calcd for C<sub>37</sub>H<sub>25</sub>F<sub>17</sub>O 808.16; Found 808.2.

### *Synthesis of the fluoroalkyl-containing acceptor dye (N-benzyl-4,4,5,5,6,6,7,7,8,8,9,9,10,10,11,11,11-heptadecafluoro-N-(4,4,5,5,6,6,7,7,8,8,9,9,10,10,11,11,11-heptadecafluoroundecyl)-N-methylundecan-1-aminium 4,4,5,5,6,6,7,7,8,8,9,9,10,10,11,11,11-heptadecafluoroundecyl 2-(6-hydroxy-3-oxo-3H-xanthen-9-yl)benzoate: [R<sub>F</sub>-DUMBA][R<sub>F</sub>-11-FL])*

*Step 1: Synthesis of fluoroalkyl-containing tertiary amines (N-benzyl-*

*4,4,5,5,6,6,7,7,8,8,9,9,10,10,11,11,11-heptadecafluoro-N-*

*(4,4,5,5,6,6,7,7,8,8,9,9,10,10,11,11,11-heptadecafluoroundecyl)undecan-1-amine: R<sub>F</sub>-DUBA)*

Benzylamine (312.9 mg, 2.92 mmol) was dissolved in 20 mL of ACN. Then, K<sub>2</sub>CO<sub>3</sub> (1.01 g, 7.30 mmol) was added, and the mixture was heated and stirred at 80°C for 15 minutes. Next, C<sub>8</sub>F<sub>17</sub>C<sub>3</sub>H<sub>6</sub>I (4.21 g, 7.16 mmol) dissolved in 30 mL of ACN was added dropwise, and the mixture was heated and stirred at 80°C overnight. After the reaction, the reaction solvent was evaporated off, then dissolved in chloroform, and washed with distilled water, and saturated NaCl aq. After drying the organic layer over anhydrous sodium sulfate, the solvent was evaporated off using an evaporator, and the layer was dried in vacuum. The obtained crude product was purified by silica gel column chromatography (hexane → hexane/chloroform = 3/7) to produce R<sub>F</sub>-DUBA (2.345 g, 78.2 %).

<sup>1</sup>H NMR (400 MHz, Chloroform-d<sub>1</sub>) δ = 7.336–7.234 (m, 5H), 3.53 (s, 2H), 2.49 (t, 4H), 2.07 (dt, 4H), 1.73 (t, 4H)

*Step 2: Synthesis of the fluoroalkyl-containing quaternary ammonium salt (N-benzyl-*

*4,4,5,5,6,6,7,7,8,8,9,9,10,10,11,11,11-heptadecafluoro-N-*

*(4,4,5,5,6,6,7,7,8,8,9,9,10,10,11,11,11-heptadecafluoroundecyl)-N-methylundecan-1-aminium*

*methyl sulfate: [R<sub>F</sub>-DUMBA][CH<sub>3</sub>OSO<sub>3</sub>])*

R<sub>F</sub>-DUBA (2.31 g, 2.25 mmol) was dissolved in 50 mL of benzotrifluoride. Then, dimethyl sulfate (425.5 mg, 3.37 mmol) was added, and the mixture was heated under reflux overnight. After the reaction, the mixture was allowed to cool to room temperature and then cooled to 0°C in an ice bath. The precipitated solid was collected by suction filtration to produce [R<sub>F</sub>-DUMBA][CH<sub>3</sub>OSO<sub>3</sub>] (1.408 g, 54.3%).

<sup>1</sup>H NMR (400 MHz, DMSO-d<sub>6</sub>) δ = 7.59–7.50 (m, 5H), 4.58 (s, 2H), 3.43 (t, 4H), 3.40 (s, 3H), 2.95 (s, 3H), 2.38 (dt, 4H), 2.03 (t, 4H)

*Step 3: Synthesis of the fluoroalkyl-containing acceptor dye ion pair ([R<sub>F</sub>-DUMBA][R<sub>F</sub>-11-FL])*

R<sub>F</sub>-11-FL was synthesized according to a previously reported method<sup>47</sup>.

R<sub>F</sub>-11-FL (214.7 mg, 0.271 mmol) and [R<sub>F</sub>-DUMBA][CH<sub>3</sub>OSO<sub>3</sub>] (312.5 mg, 0.271 mmol) were dissolved in 90 mL of dichloromethane. Then 30 mL of saturated NaHCO<sub>3</sub> aq. was added and the mixture was stirred at room temperature for 1 hour. After the reaction, the aqueous layer was removed and the reaction solvent was evaporated. The residue was redissolved in ethyl acetate and washed with distilled water and saturated NaCl aq. After drying the organic layer over anhydrous sodium sulfate, the solvent was evaporated off using a rotary evaporator and dried in vacuum to produce [R<sub>F</sub>-DUMBA][R<sub>F</sub>-11-FL] (508.5 mg, 102.4 %).

<sup>1</sup>H NMR (400 MHz, Methanol-d<sub>4</sub>) δ = 8.27(d, 1H), 7.85–7.75 (dd, 2H), 7.60–7.53 (m, 5H), 7.41

(d, 1H), 6.93 (d, 2H), 6.62–6.58 (m, 4H), 4.62 (s, 2H), 4.04 (t, 2H), 3.45(t, 4H), 3.07 (s, 3H), 2.43–2.11 (m, 8H), 1.94 (dt, 2H), 1.61 (t, 2H)

ESI-MS (positive mode)  $m/z$ : Calcd for  $C_{30}H_{22}F_{34}N^+$  1042.1; Found 1042.1.

ESI-MS (negative mode)  $m/z$ : Calcd for  $C_{31}H_{16}F_{17}O_6^-$  791.1; Found 791.2.

*Synthesis of the fluoroalkyl-containing ion pair (N-benzyl-4,4,5,5,6,6,7,7,8,8,9,9,10,10,11,11,11-heptadecafluoro-N-(4,4,5,5,6,6,7,7,8,8,9,9,10,10,11,11,11-heptadecafluoroundecyl)-N-methylundecan-1-aminium bis(perfluorobutyl)sulfonyl)amide: [R<sub>f</sub>-DUMBA][R<sub>f</sub>-DBSI]*

K[R<sub>f</sub>-DBSI] (150.6 mg, 0.243 mmol) and [R<sub>f</sub>-DUMBA][CH<sub>3</sub>OSO<sub>3</sub>] (280.6 mg, 0.243 mmol) were dissolved in 80 mL of dichloromethane. Then 30 mL of saturated NaHCO<sub>3</sub> aq. was added and the mixture was stirred at room temperature for 1 hour. After the reaction, the aqueous layer was removed and the reaction solvent was evaporated. The residue was redissolved in ethyl acetate and washed with distilled water and saturated NaCl aq. After drying the organic layer over anhydrous sodium sulfate, the solvent was evaporated off using a rotary evaporator and dried in vacuum to produce [R<sub>f</sub>-DUMBA][R<sub>f</sub>-DBSI] (368.4 mg, 93.4 %).

Anal. Calcd for C<sub>38</sub>H<sub>22</sub>F<sub>52</sub>N<sub>2</sub>O<sub>4</sub>S<sub>2</sub>: C, 28.13; H, 1.37; N, 1.73. Found: C, 28.18; H, 1.49; N, 2.04.

ESI-MS (positive mode)  $m/z$ : Calcd for  $C_{30}H_{22}F_{34}N^+$  1042.1; Found 1042.1.

ESI-MS (negative mode)  $m/z$ : Calcd for  $C_8F_{18}NO_4S_2^-$  579.9; Found 580.0.

#### *Preparation and characterization of NE*

The donor dye (R<sub>f</sub>-11-TPE), the acceptor dye ([R<sub>f</sub>-DUMBA][R<sub>f</sub>-11-FL]), and the surfactant (Pluronic® F-127) were weighed and dissolved in 1.5 mL of THF. When required, the fluoroalkyl-containing ion pair ([R<sub>f</sub>-DUMBA][R<sub>f</sub>-DBSI]) was also dissolved in the same THF solution. An aliquot of 1.0 mL of the resulting THF solution was added to 9.0 mL of ultrapure water using a micropipette, followed by sonication for 5 min. THF was then removed by blowing nitrogen gas, and the NE was obtained.

For the preparation of conventional NEs used in comparative experiments, bis(2-ethyl hexyl) sebacate (DOS) was employed instead of the donor dye (R<sub>f</sub>-11-TPE), and the alkyl-containing ion pair ([P<sub>66614</sub>][DOP]) was used instead of the fluoroalkyl-containing ion pair ([R<sub>f</sub>-DUMBA][R<sub>f</sub>-DBSI]). In this case, the amounts of DOS and [P<sub>66614</sub>][DOP] were adjusted to be equimolar to those of R<sub>f</sub>-11-TPE and [R<sub>f</sub>-DUMBA][R<sub>f</sub>-DBSI], respectively. The compositions of the NEs used in each experiment are listed in Table S1.

The particle size of the NEs was measured using a nanoparticle analyzer (NanoPartica SZ-100V2, HORIBA, Kyoto, Japan). In all cases, the average particle size was approximately ~100 nm, indicating that uniform NEs were successfully prepared (Table S1).

### *Fluorescence spectrophotometric measurements of NE*

Fluorescence spectra were measured at room temperature using a fluorescence spectrophotometer (FP-8550, JASCO CORPORATION, Tokyo, Japan). The excitation wavelengths and other measurement conditions were set according to each experiment and are described in the figure captions. The sample preparation conditions for each experiment are detailed below.

#### *(i) Characterization of FRET performance*

FRET-based NEs with varying amounts of acceptor dye ( $[A] / [D] = 0 - 5.0$  mol%, without ion pair) were prepared, mixed with ultrapure water and NaOH aqueous solution, and diluted, resulting in  $[D] = 2.0 \times 10^{-6}$  M and  $[NaOH] = 100$  mM. Fluorescence spectra of these samples were measured under donor excitation (with FRET) and acceptor excitation (without FRET), respectively.

In addition, a conventional NE using bis(2-ethyl hexyl) sebacate (DOS) as the matrix ( $[A] / [DOS] = 2.0$  mol%, without ion pair) was prepared under the same conditions, and fluorescence spectra were measured under acceptor excitation.

#### *(ii) Evaluation of response to PFOS<sup>-</sup>*

FRET-based NEs ( $[A] / [D] = 2.0$  mol%, with or without ion pair) were prepared, mixed with ultrapure water and either HEPES buffer (pH 7.4) containing KPFOS or NaOH/HCl aqueous solution, and diluted, resulting in  $[D] = 2.0 \times 10^{-5} - 2.0 \times 10^{-7}$  M,  $[A] = 4.0 \times 10^{-7} - 4.0 \times 10^{-9}$  M,  $[PFOS^-] = 0, 10^{-5} - 10^{-8}$  M,  $[HEPES] = 50$  mM, and  $[NaOH / HCl] = 100$  mM. Fluorescence spectra were measured under donor excitation for each sample.

#### *(iii) Evaluation of selectivity toward interfering anions*

A FRET-based NE ( $[A] / [D] = 2.0$  mol%, with ion pair) was prepared, mixed with ultrapure water and either HEPES buffer (pH 7.4) containing various anions ( $Na_2SO_4$ , NaCl, NaBr, NaOS, NaSCN,  $NaClO_4$ , PFOA, KPFOS, OLA) or NaOH/HCl aqueous solution, and diluted, resulting in  $[D] = 2.0 \times 10^{-5}$  M,  $[A] = 4.0 \times 10^{-7}$  M,  $[anion] = 0, 10^{-8} - 10^0$  M,  $[HEPES] = 50$  mM, and  $[NaOH / HCl] = 100$  mM. Fluorescence spectra were measured under donor excitation for each sample.

In addition, a conventional NE using bis(2-ethyl hexyl) sebacate (DOS) as the matrix ( $[A] / [DOS] = 2.0$  mol%, with ion pair  $[P_{66614}][DOP]$ ) was prepared under the same conditions, and fluorescence spectra were measured under acceptor excitation.

#### *(iv) Evaluation of response to PFOS<sup>-</sup> in tap water and artificial seawater*

Artificial seawater was prepared based on ASTM D1141 using a simplified composition consisting of major inorganic salts. The concentrations of each component were as follows: NaCl (24.53 g/L), MgCl<sub>2</sub> (5.20 g/L), Na<sub>2</sub>SO<sub>4</sub> (4.09 g/L), CaCl<sub>2</sub> (1.16 g/L), and KCl (0.695 g/L). The stock solution was prepared at three times the target concentration to account for dilution upon mixing with the NE and buffer solutions.

A FRET-based NE ([A] / [D] = 2.0 mol%, with ion pair) was prepared, diluted with ultrapure water and then mixed with tap water or artificial seawater and HEPES buffer (pH 7.4) containing KPFS. The final concentrations were adjusted to [D] = 2.0 × 10<sup>-7</sup> M, [A] = 4.0 × 10<sup>-9</sup> M, [PFOS<sup>-</sup>] = 0, 10<sup>-10</sup> – 10<sup>-5</sup> M, [HEPES] = 50 mM.

Under these conditions, the tap water samples were effectively diluted 3-fold upon mixing, whereas the artificial seawater samples corresponded to the original (1×) concentration. To evaluate the effect of ionic strength, the artificial seawater was further diluted with ultrapure water to 0.1×–0.025×, corresponding to 10–40-fold dilution conditions. Fluorescence spectra were measured under donor excitation for each sample.

#### *Evaluation of FRET efficiency and sensitivity*

##### *(i) FRET efficiency*

FRET efficiency (FE) was calculated based on the fluorescence spectra as follows:

$$FE = 1 - \frac{I_{D(A=x)}}{I_{D(A=0)}}$$

where  $I_{D(A=x)}$  is the donor fluorescence intensity in the presence of the acceptor at x mol%, and  $I_{D(A=0)}$  is the donor fluorescence intensity in the absence of the acceptor.

##### *(ii) Evaluation of FRET-based fluorescence enhancement effect*

The fluorescence enhancement effect induced by FRET was evaluated by comparing the acceptor fluorescence intensity under FRET conditions with that under non-FRET conditions.

Because the acceptor fluorescence peak during FRET is overlapped with donor fluorescence, the net acceptor fluorescence was calculated using the following equation to eliminate its influence and used for evaluation.

$$\text{Net acceptor fluorescence} = I_{A(A=x)} - (I_{A(A=0)}(1 - FE_{(A=x)}))$$

$I_{A(A=x)}$  is the fluorescence intensity of the acceptor when x mol% of the acceptor is present, and  $FE_{(A=x)}$  is the FRET efficiency when x mol% of the acceptor is present.

The acceptor fluorescence intensity under non-FRET conditions was measured using the same NE and excited at the acceptor excitation wavelength (514 nm). The fluorescence enhancement factor due to FRET was calculated by dividing the net acceptor fluorescence intensity under FRET conditions by that under non-FRET conditions.

### *Evaluation of anion response*

The fluorescence intensity ( $I$ ) measured for each sample was used to calculate the deprotonation degree ( $\alpha$ ) of the acceptor dye, which was employed to evaluate the response to anions. The deprotonation degree  $\alpha$  is defined as follows:

$$\alpha = \frac{I_{sample} - I_{HCl}}{I_{NaOH} - I_{HCl}}$$

where  $I_{sample}$  is the fluorescence intensity of the sample solution, and  $I_{HCl}$  and  $I_{NaOH}$  are the fluorescence intensities measured in the presence of HCl and NaOH aqueous solutions, corresponding to the fully protonated and deprotonated states of the acceptor dye, respectively.

For measurements in tap water and artificial seawater, the normalization constants  $I_{HCl}$  and  $I_{NaOH}$  were consistently determined using ultrapure water.

### *Fitting with theoretical response curve and calculation of selectivity coefficient*

Response curves were drawn according to general extraction equilibrium theoretical formulas and fitted by the least squares method.  $\alpha_{max}$  was set to the value of  $\alpha$  in anion-free buffer to avoid background effects.

The selectivity coefficient,  $\log K_{PFOS^-,j}^{opt}$ , is usually calculated from the anion concentration ratio showing  $\alpha = 1/2$ , but in order to eliminate background effects, it was calculated from the anion concentration ratio showing  $\alpha = \alpha_{max}/2$ .

## Supplementary Figures

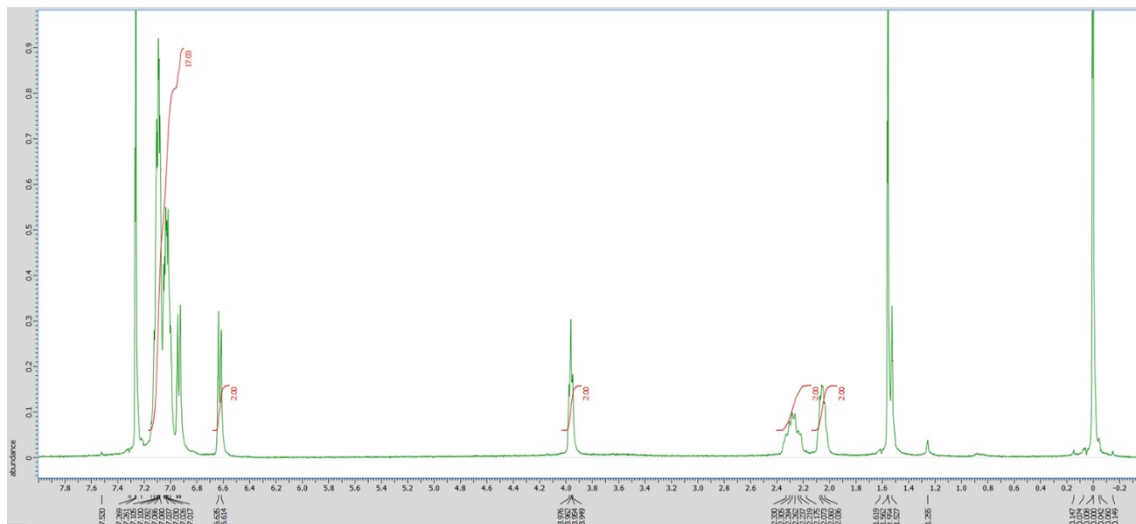

**Fig. S1** <sup>1</sup>H NMR spectrum of synthesized R<sub>f</sub>-11-TPE

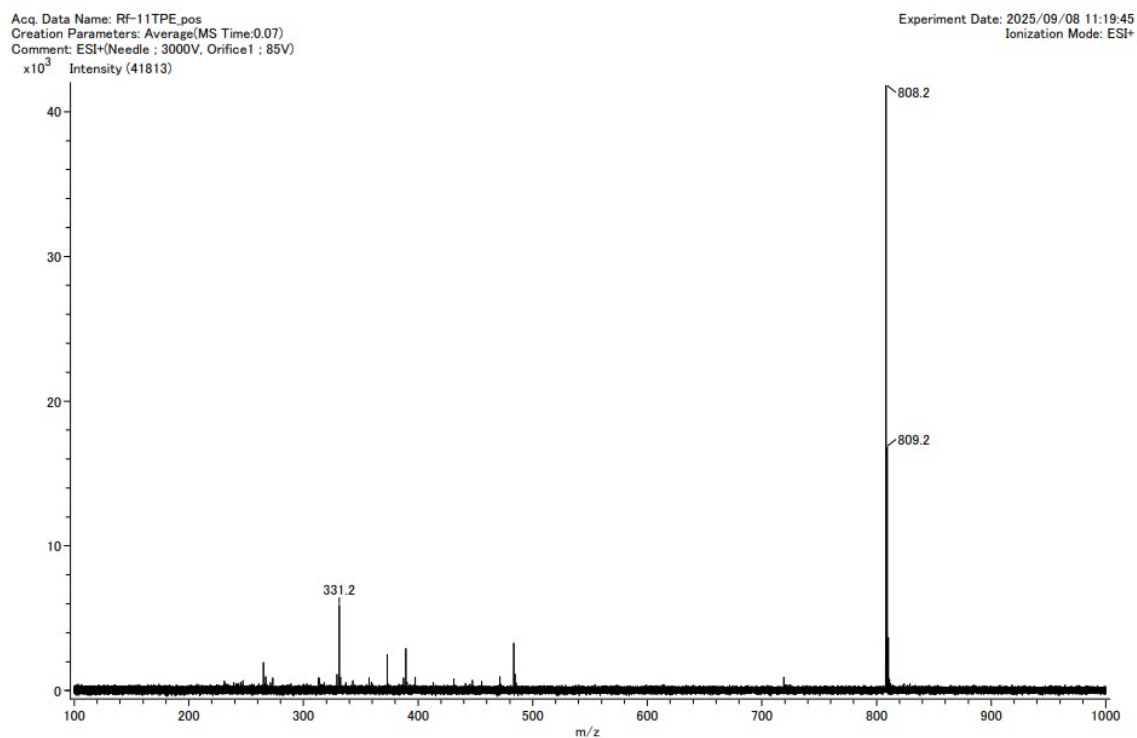

**Fig. S2** ESI-MS spectrum of synthesized R<sub>f</sub>-11-TPE

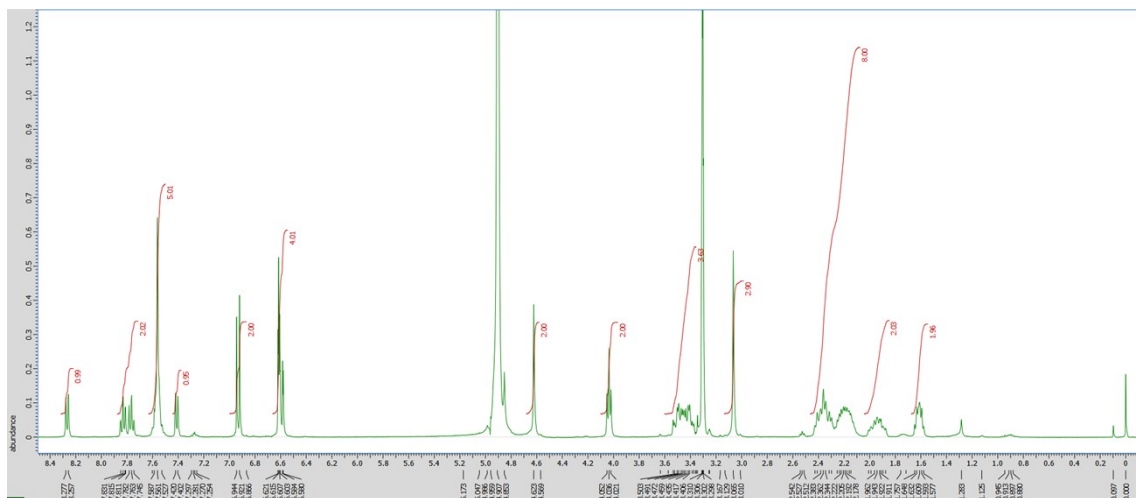

**Fig. S3** <sup>1</sup>H NMR spectrum of synthesized [R<sub>f</sub>-DUMBA][R<sub>f</sub>-11-FL]

(a)

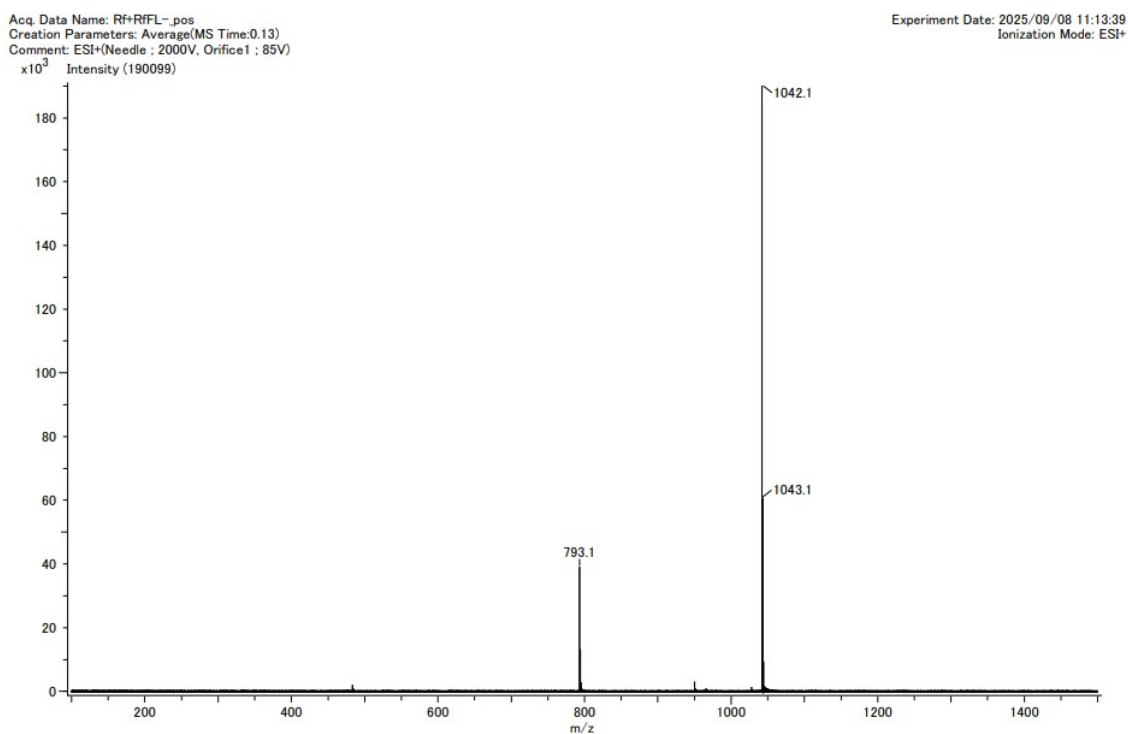

(b)

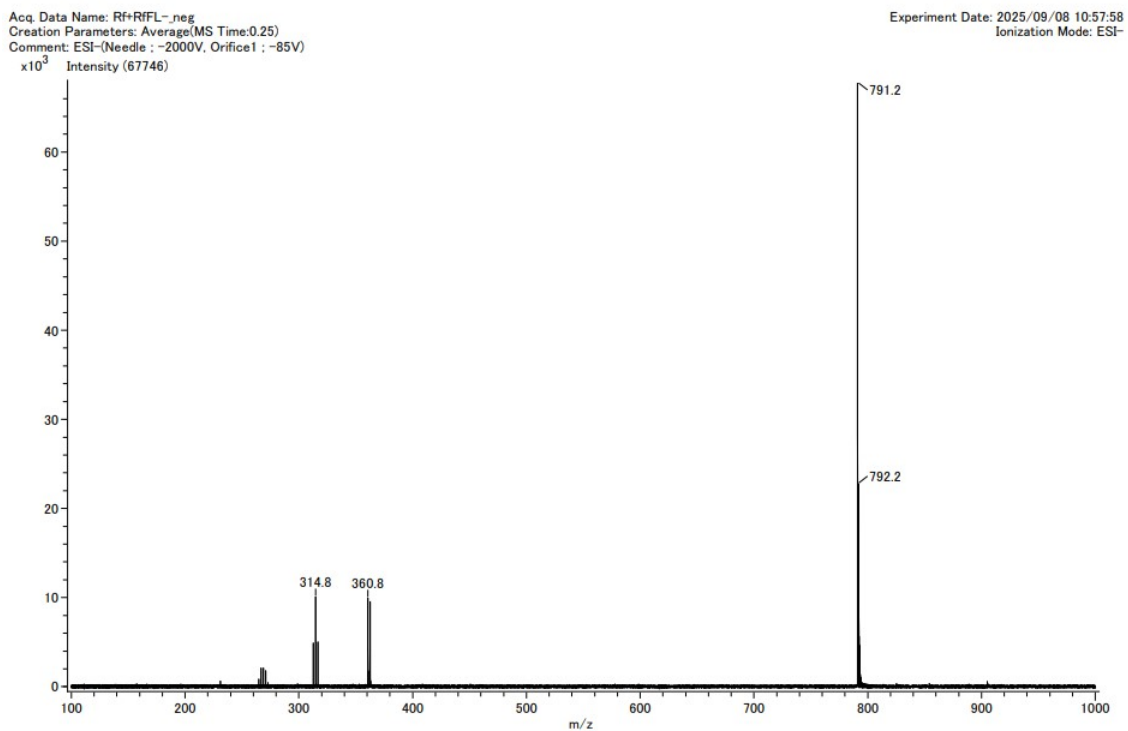

**Fig. S4** ESI-MS spectra of synthesized [R<sub>f</sub>-DUMBA][R<sub>f</sub>-11-FL]: (a) positive mode, (b) negative mode

(a)

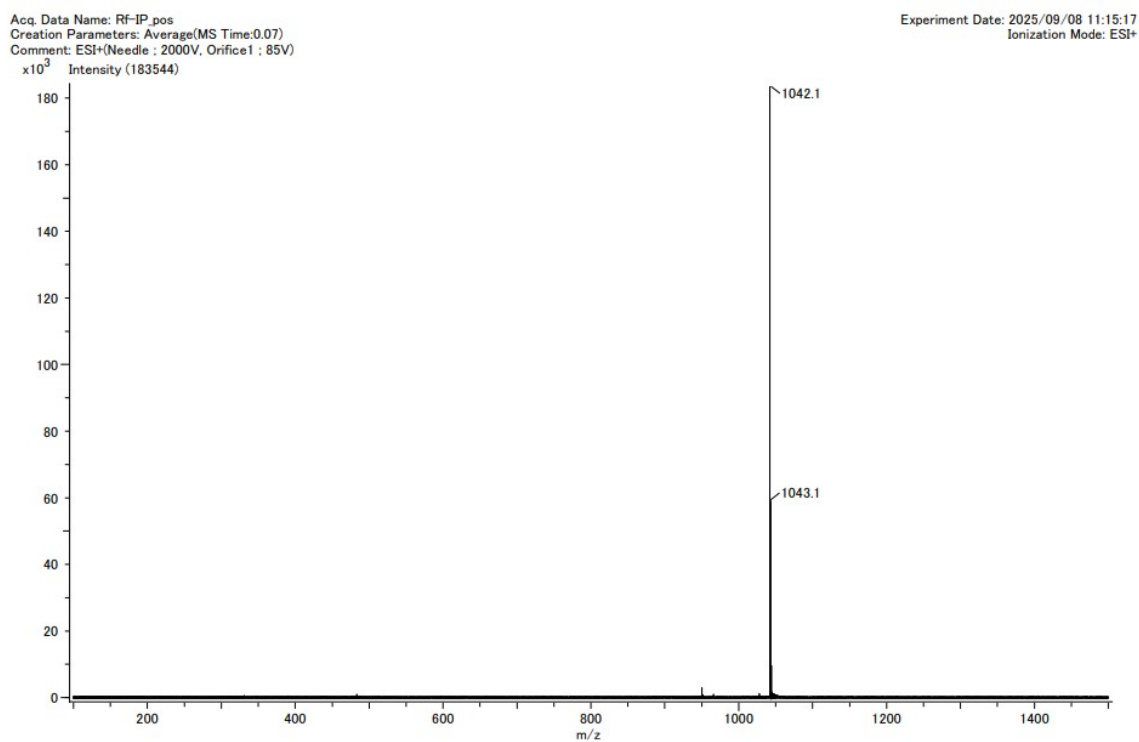

(b)

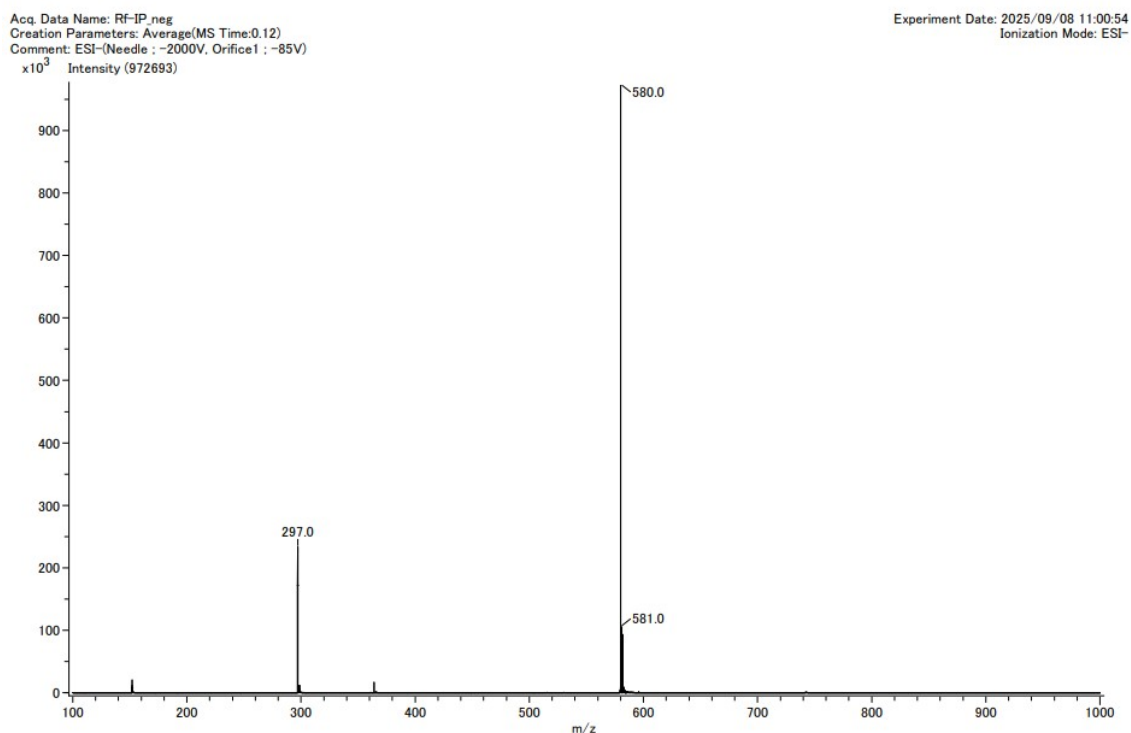

**Fig. S5** ESI-MS spectra of synthesized [R<sub>f</sub>-DUMBA][R<sub>f</sub>-DBSI]: (a) positive mode, (b) negative mode

**Table S1** Average particle size and average polydispersity index of NE ( $N = 3$ ).

(a) NEs without IP

| [A] / [D] (mol%)          | Average particle size / nm | Average polydispersity index |
|---------------------------|----------------------------|------------------------------|
| 0                         | 77.5 ± 2.2                 | 0.245 ± 0.027                |
| 0.1                       | 75.4 ± 5.6                 | 0.266 ± 0.039                |
| 0.3                       | 82.2 ± 1.8                 | 0.321 ± 0.028                |
| 0.5                       | 61.0 ± 4.6                 | 0.332 ± 0.045                |
| 1.0                       | 81.5 ± 1.5                 | 0.301 ± 0.009                |
| 1.5                       | 73.5 ± 0.4                 | 0.359 ± 0.000                |
| 2.0                       | 68.4 ± 2.1                 | 0.339 ± 0.014                |
| 2.5                       | 79.4 ± 5.4                 | 0.318 ± 0.052                |
| 3.0                       | 91.2 ± 4.7                 | 0.378 ± 0.074                |
| 4.0                       | 75.3 ± 3.8                 | 0.310 ± 0.017                |
| 5.0                       | 80.3 ± 2.1                 | 0.407 ± 0.023                |
| <b>2.0 (Conventional)</b> | 108.5 ± 3.1                | 0.404 ± 0.086                |

(b) NEs with IP ([IP]/[D] = 50 mol%)

| [A] / [D] (mol%)          | Average particle size / nm | Average polydispersity index |
|---------------------------|----------------------------|------------------------------|
| 2.0                       | 102.6 ± 2.8                | 0.494 ± 0.039                |
| <b>2.0 (Conventional)</b> | 98.5 ± 4.9                 | 0.369 ± 0.065                |

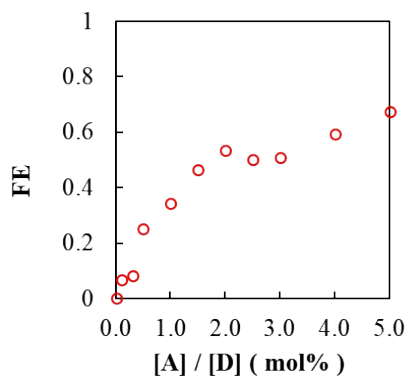

**Fig. S6** FRET efficiency with different amounts of acceptor dye added ( $[D] = 2.0 \times 10^{-6}$  M,  $[A]/[D] = 0 - 5.0$  mol%,  $\lambda_{ex} = 316$  nm).

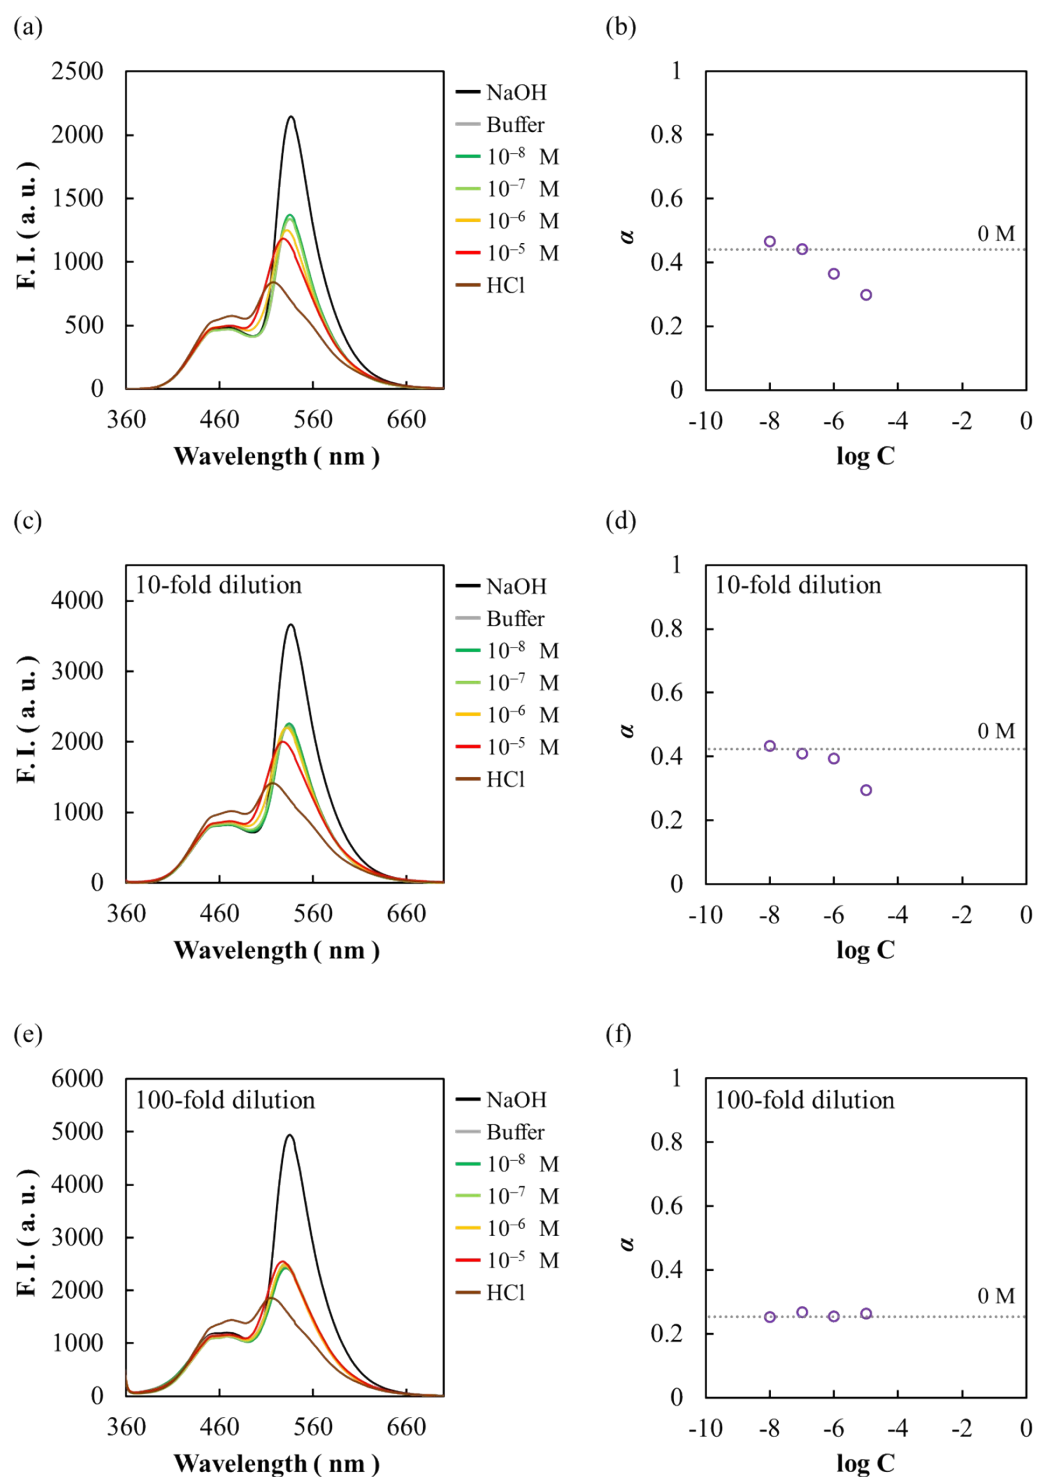

**Fig. S7** PFOS<sup>-</sup> response of the FRET-based fluorogenic NEs without IP. Fluorescence spectra for PFOS<sup>-</sup> (left) and response curves for PFOS<sup>-</sup> (right). ((a)(b) [D] = 2.0 × 10<sup>-5</sup> M, Sensitivity: Low, (c)(d) [D] = 2.0 × 10<sup>-6</sup> M, Sensitivity: Medium, (e)(f) [D] = 2.0 × 10<sup>-7</sup> M, Sensitivity: High)

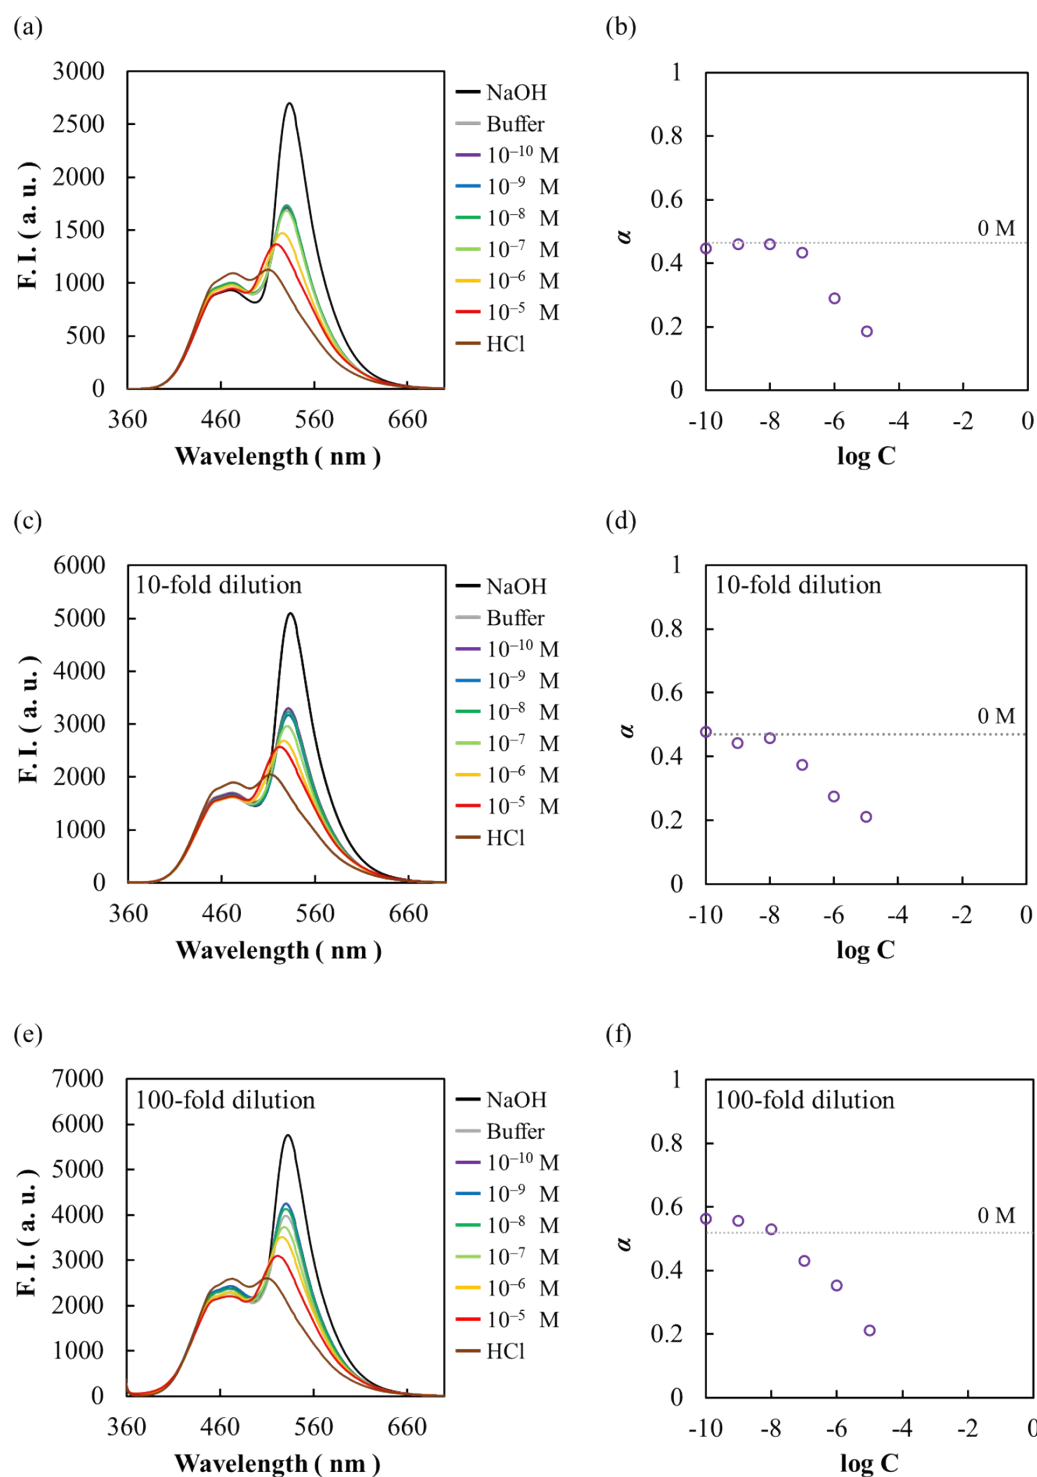

**Fig. S8** PFOS<sup>-</sup> response of the FRET-based fluoros NEs with IP. Fluorescence spectra for PFOS<sup>-</sup> (left) and response curves for PFOS<sup>-</sup> (right). ((a)(b) [D] = 2.0 × 10<sup>-5</sup> M, Sensitivity: Low, (c)(d) [D] = 2.0 × 10<sup>-6</sup> M, Sensitivity: Medium, (e)(f) [D] = 2.0 × 10<sup>-7</sup> M, Sensitivity: High)

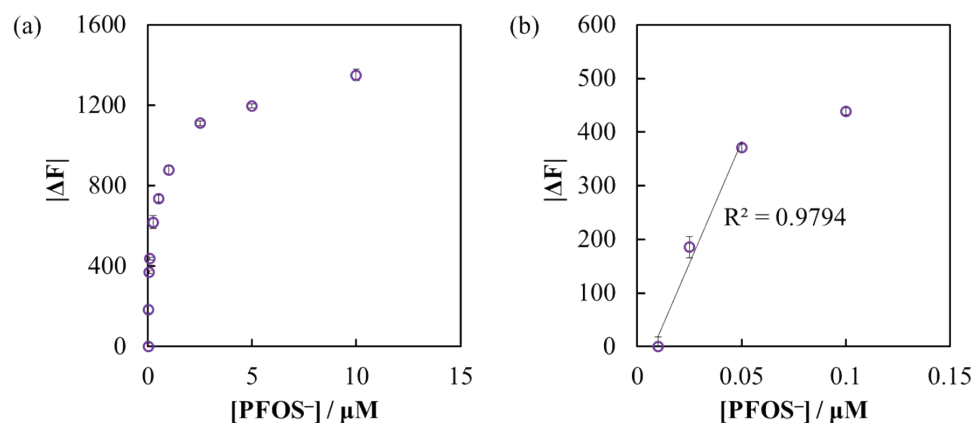

**Fig. S9** Relationship between fluorescence intensity change  $|\Delta F|$  and PFOS<sup>-</sup> concentration. (a) Full concentration range. (b) Enlarged view of the low-concentration region with linear fitting. ( $[D] = 2.0 \times 10^{-7} \text{ M}$ )

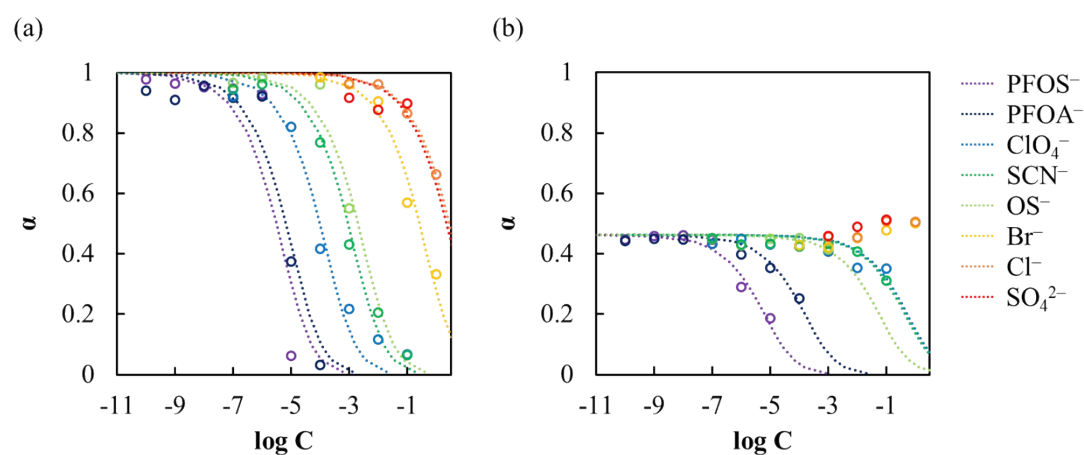

**Fig. S10** Response curves for each anion of (a) a conventional non-fluorous NE, and (b) the FRET-based fluoruous NE.

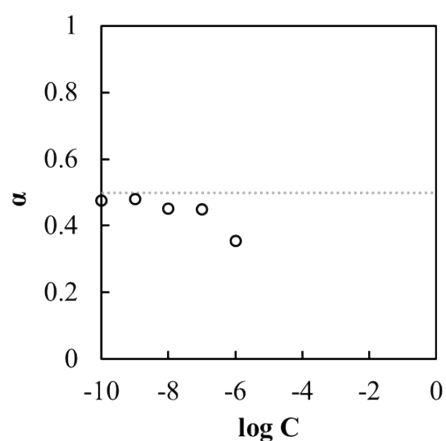

**Fig. S11** Response curves for OLA<sup>-</sup> of the FRET-based fluoros NE.

**Table S2** Comparison of the analytical performance of the proposed FRET-based fluoros NE optodes with previously reported PFOS detection methods

| Sensor Platform (Material)                                | Detection Method | LOD (nM) | Response time |
|-----------------------------------------------------------|------------------|----------|---------------|
| <b>FRET-based fluoros NE optodes (this work)</b>          | Fluorescence     | 10–100   | Seconds       |
| <b>Au@PEG-F nanoparticles<sup>10</sup></b>                | Colorimetric     | 20       | 30 min        |
| <b>PDI derivative<sup>12</sup></b>                        | Fluorescence     | 28       | 10 min        |
| <b>Carbon dots / Berberine<sup>15</sup></b>               | Fluorescence     | 21.7     | 10 min        |
| <b>CdTe quantum dots<sup>16</sup></b>                     | Fluorescence     | 0.044    | 10 min        |
| <b>MIP-SiO<sub>2</sub> nanoparticles<sup>17</sup></b>     | Fluorescence     | 10.36    | 5 min         |
| <b>Amplifying fluorescent polymers (AFP)<sup>19</sup></b> | Fluorescence     | 0.18     | 1 hour        |
